# Supplementary material
Source: MDPI journal article supplement (https://www.mdpi.com/2304-6740/10/8/104)
Supplement: s1 [file s1]

# New organometallic framework coordination polymer $\{(\text{NMe}_2\text{H}_2)[\text{Sm}(\text{TDA})(\text{HCOO})]\}$ : synthesis, structure and effect of isomorphic substitution of samarium with $\text{Gd}^{3+}$ and $\text{Tb}^{3+}$ ions on luminescent properties

Anna A. Ivanova<sup>1</sup>, Victoria E. Gontcharenko<sup>1,2</sup>, Alexey M. Lunev<sup>1</sup>, Anastasia V. Sidoruk<sup>1</sup>, Ilya A. Arkhipov<sup>1</sup>, Ilya V. Taydakov<sup>2</sup> and Yuriy A. Belousov<sup>1,2</sup>

<sup>1</sup> Chemistry Department, Moscow State University, Leninskie Gory, 119991 Moscow, Russia;  
anna.ivanova@chemistry.msu.ru (A.A.I.), victo.goncharenko@gmail.com (V.E.G.),  
lunev94@yandex.ru (A.M.L.), avs\_1999@mail.ru (A.V.S.), ilia.arkhipov@chemistry.msu.ru  
(I.A.A.), belousov@inorg.chem.msu.ru

<sup>2</sup> P. N. Lebedev Physical Institute of Russian Academy of Sciences, 119991 Moscow, Russia;  
taidakov@mail.ru

\* Correspondence: belousov@inorg.chem.msu.ru

## Supporting information

|                                                                                                                                                         |    |
|---------------------------------------------------------------------------------------------------------------------------------------------------------|----|
| Table S1 Selected crystal data and parameters for structure refinement of the Sm-TDA and Gd-TDA .....                                                   | 2  |
| Table S2 $\text{Sm}^{3+}$ luminescence fitting parameters for $\text{Sm}_x\text{Gd}_{1-x}\text{-TDA}$ .....                                             | 3  |
| Table S3 $\text{Tb}^{3+}$ luminescence fitting parameters for $\text{Sm}_x\text{Tb}_{1-x}\text{-TDA}$ .....                                             | 5  |
| Figure S1 IR spectra of complexes $\text{Sm}_x\text{Gd}_{1-x}\text{-TDA}$ and free $\text{H}_3\text{TDA}$ ligand .....                                  | 7  |
| Figure S2 IR spectra of complexes $\text{Sm}_x\text{Tb}_{1-x}\text{-TDA}$ and free $\text{H}_3\text{TDA}$ ligand .....                                  | 8  |
| Figure S3 Excitation spectra of $\text{Sm}_x\text{Gd}_{1-x}\text{-TDA}$ complexes ( $\lambda_{\text{em}}$ 648 nm). ....                                 | 9  |
| Figure S4 $\text{Sm}^{3+}$ decay curves for $\text{Sm}_x\text{Gd}_{1-x}\text{-TDA}$ ; $\lambda_{\text{ex}}$ =280 nm, $\lambda_{\text{em}}$ =648 nm..... | 10 |
| Figure S5 $\text{Tb}^{3+}$ decay curves for $\text{Sm}_x\text{Tb}_{1-x}\text{-TDA}$ ; $\lambda_{\text{ex}}$ =280 nm, $\lambda_{\text{em}}$ =545 nm..... | 11 |
| Figure S6 $\text{Sm}^{3+}$ decay curves for $\text{Sm}_x\text{Tb}_{1-x}\text{-TDA}$ ; $\lambda_{\text{ex}}$ =280 nm, $\lambda_{\text{em}}$ =648 nm..... | 12 |

Table S1. Selected crystal data and parameters for structure refinement of the Sm-TDA and Gd-TDA

| Chemical formula                                                     | $[(\text{CH}_3)_2\text{NH}_2]^+[\text{Sm}(\text{C}_4\text{N}_3\text{O}_4)(\text{HCOO})]^- \cdot 0.5\text{H}_2\text{O}$ ( <b>Sm-TDA</b> ) | $[(\text{CH}_3)_2\text{NH}_2]^+[\text{Gd}(\text{C}_4\text{N}_3\text{O}_4)(\text{HCOO})]^- \cdot 0.5\text{H}_2\text{O}$ ( <b>Gd-TDA</b> ) |
|----------------------------------------------------------------------|------------------------------------------------------------------------------------------------------------------------------------------|------------------------------------------------------------------------------------------------------------------------------------------|
| $M_r$                                                                | 404.54                                                                                                                                   | 411.44                                                                                                                                   |
| Temperature, K                                                       | 100(2)                                                                                                                                   | 120(2)                                                                                                                                   |
| Crystal system                                                       | Orthorhombic                                                                                                                             |                                                                                                                                          |
| Space group                                                          | $Pna2_1$                                                                                                                                 |                                                                                                                                          |
| $a$ , Å                                                              | 12.8521(5)                                                                                                                               | 12.8145(9)                                                                                                                               |
| $b$ , Å                                                              | 10.0035(5)                                                                                                                               | 9.9105(6)                                                                                                                                |
| $c$ , Å                                                              | 8.9281(7)                                                                                                                                | 8.8666(6)                                                                                                                                |
| $\alpha$ ( $= \beta = \gamma$ ), °                                   | 90                                                                                                                                       |                                                                                                                                          |
| $V$ , Å <sup>3</sup>                                                 | 1147.85(12)                                                                                                                              | 1126.04(13)                                                                                                                              |
| $Z$                                                                  | 4                                                                                                                                        |                                                                                                                                          |
| $\rho_{\text{calc}}$ , g/cm <sup>3</sup>                             | 2.341                                                                                                                                    | 2.427                                                                                                                                    |
| $\mu$ (MoK $\alpha$ ), mm <sup>-1</sup>                              | 5.149                                                                                                                                    | 5.924                                                                                                                                    |
| $F(000)$                                                             | 776                                                                                                                                      | 784                                                                                                                                      |
| $\theta_{\text{min}} - \theta_{\text{max}}$ , °                      | 2.58 – 30.00                                                                                                                             | 2.60 – 30.50                                                                                                                             |
| No. of measured reflections                                          | 9670                                                                                                                                     | 10981                                                                                                                                    |
| No. of unique reflections ( $R_{\text{int}}$ )                       | 3309 ( $R_{\text{int}} = 0.0283$ )                                                                                                       | 3060 ( $R_{\text{int}} = 0.0569$ )                                                                                                       |
| No. of parameters                                                    | 196                                                                                                                                      | 193                                                                                                                                      |
| GoF                                                                  | 1.235                                                                                                                                    | 1.132                                                                                                                                    |
| $R_1$ ( $I > 2\sigma(I)$ )                                           | 0.0303                                                                                                                                   | 0.0460                                                                                                                                   |
| $\omega R_2$ (all reflections)                                       | 0.0616                                                                                                                                   | 0.0852                                                                                                                                   |
| $\Delta\rho_{\text{max}}/\Delta\rho_{\text{min}}$ , e/Å <sup>3</sup> | 1.91/-2.645                                                                                                                              | 2.29/-2.44                                                                                                                               |

**Table S2. Sm<sup>3+</sup> luminescence fitting parameters for Sm<sub>x</sub>Gd<sub>1-x</sub>-TDA**

|          |    | Value    | Standard Error | Reduced Chi-Sqr | Adj. R-Square |
|----------|----|----------|----------------|-----------------|---------------|
| Sm100    | y0 | 9.80E-04 | 3.53E-05       | 1.43E-07        | 0.99998       |
|          | A1 | 0.76118  | 9.43E-04       |                 |               |
|          | t1 | 3.85709  | 0.0063         |                 |               |
|          | A2 | 0.01974  | 9.71E-04       |                 |               |
|          | t2 | 17.41743 | 0.62067        |                 |               |
| Sm90Gd10 | y0 | 0.01041  | 5.33E-04       | 8.77E-06        | 0.99935       |
|          | A1 | 0.61145  | 0.01268        |                 |               |
|          | t1 | 3.6055   | 0.07618        |                 |               |
|          | A2 | 0.12063  | 0.01292        |                 |               |
|          | t2 | 13.56254 | 0.99967        |                 |               |
| Sm80Gd20 | y0 | 0.00329  | 1.12E-04       | 6.30E-07        | 0.99993       |
|          | A1 | 0.77906  | 9.56E-04       |                 |               |
|          | t1 | 4.8335   | 0.01089        |                 |               |
|          | A2 | 0.02501  | 8.59E-04       |                 |               |
|          | t2 | 34.75123 | 1.36292        |                 |               |
| Sm70Gd30 | y0 | 0.00406  | 2.48E-04       | 5.75E-06        | 0.99936       |
|          | A1 | 0.6951   | 0.00574        |                 |               |
|          | t1 | 4.92712  | 0.05251        |                 |               |
|          | A2 | 0.06959  | 0.00593        |                 |               |
|          | t2 | 21.70083 | 1.35538        |                 |               |
| Sm60Gd40 | y0 | 0.00241  | 1.16E-04       | 7.18E-07        | 0.99994       |
|          | A1 | 0.78901  | 0.0015         |                 |               |
|          | t1 | 6.34083  | 0.01748        |                 |               |
|          | A2 | 0.0443   | 0.00152        |                 |               |
|          | t2 | 31.93394 | 0.97294        |                 |               |
| Sm50Gd50 | y0 | 0.00114  | 5.96E-05       | 1.60E-07        | 0.99999       |
|          | A1 | 0.81526  | 9.44E-04       |                 |               |
|          | t1 | 7.87333  | 0.01092        |                 |               |
|          | A2 | 0.0674   | 9.70E-04       |                 |               |
|          | t2 | 33.27221 | 0.37929        |                 |               |
| Sm40Gd60 | y0 | 0.00241  | 2.04E-04       | 1.80E-06        | 0.99991       |
|          | A1 | 0.72117  | 0.00378        |                 |               |
|          | t1 | 8.56416  | 0.04838        |                 |               |
|          | A2 | 0.16548  | 0.00389        |                 |               |
|          | t2 | 33.08668 | 0.57253        |                 |               |
| Sm30Gd70 | y0 | 0.00176  | 1.50E-04       | 4.90E-07        | 0.99998       |
|          | A1 | 0.68538  | 0.00224        |                 |               |
|          | t1 | 11.06936 | 0.03519        |                 |               |
|          | A2 | 0.24306  | 0.00227        |                 |               |
|          | t2 | 41.04383 | 0.29758        |                 |               |
| Sm20Gd80 | y0 | 0.00432  | 2.80E-04       | 1.60E-06        | 0.99995       |
|          | A1 | 0.46825  | 0.00394        |                 |               |
|          | t1 | 11.16875 | 0.09253        |                 |               |
|          | A2 | 0.45829  | 0.00397        |                 |               |
|          | t2 | 42.02734 | 0.29074        |                 |               |
| Sm90Gd10 | y0 | 0.00272  | 2.89E-04       | 8.05E-07        | 0.99998       |

|          |    |          |          |          |         |
|----------|----|----------|----------|----------|---------|
|          | A1 | 0.3292   | 0.00494  |          |         |
|          | t1 | 15.29796 | 0.16643  |          |         |
|          | A2 | 0.62657  | 0.0049   |          |         |
|          | t2 | 47.50363 | 0.26211  |          |         |
| Sm08Gd92 | y0 | 0.00679  | 6.19E-04 | 8.81E-06 | 0.99976 |
|          | A1 | 0.23515  | 0.00456  |          |         |
|          | t1 | 8.03598  | 0.23395  |          |         |
|          | A2 | 0.6507   | 0.00442  |          |         |
|          | t2 | 44.5726  | 0.34073  |          |         |
| Sm06Gd94 | y0 | 0.00938  | 5.53E-04 | 9.60E-06 | 0.99976 |
|          | A1 | 0.18441  | 0.00341  |          |         |
|          | t1 | 5.49536  | 0.19087  |          |         |
|          | A2 | 0.7225   | 0.00291  |          |         |
|          | t2 | 42.67809 | 0.23131  |          |         |
| Sm04Gd96 | y0 | 0.00536  | 4.63E-04 | 3.54E-06 | 0.99993 |
|          | A1 | 0.14384  | 0.00372  |          |         |
|          | t1 | 9.89864  | 0.32534  |          |         |
|          | A2 | 0.79546  | 0.00366  |          |         |
|          | t2 | 47.34877 | 0.22836  |          |         |
| Sm02Gd98 | y0 | 0.06057  | 0.00113  | 3.32E-05 | 0.9974  |
|          | A1 | 0.39989  | 0.00545  |          |         |
|          | t1 | 4.12159  | 0.11395  |          |         |
|          | A2 | 0.31707  | 0.0035   |          |         |
|          | t2 | 48.00162 | 0.94742  |          |         |

**Table S3. Tb<sup>3+</sup> luminescence fitting parameters for Sm<sub>x</sub>Tb<sub>1-x</sub>-TDA**

|          |    | Value      | Standard Error | Reduced Chi-Sqr | Adj. R-Square |
|----------|----|------------|----------------|-----------------|---------------|
| Sm90Tb10 | y0 | 0.1324     | 0.1878         | 0.75923         | 0.99016       |
|          | A1 | -2.02E+07  | --             |                 |               |
|          | t1 | 0.02315    | 8.50E+15       |                 |               |
|          | A2 | 106.07984  | 5.1217         |                 |               |
|          | t2 | 7.75162    | 0.25497        |                 |               |
| Sm80Tb20 | y0 | -0.34332   | 0.13882        | 0.39717         | 0.9994        |
|          | A1 | 2.62E+12   | 3.84E+13       |                 |               |
|          | t1 | 0.34217    | 0.19144        |                 |               |
|          | A2 | 344.34815  | 6.54948        |                 |               |
|          | t2 | 7.41737    | 0.07835        |                 |               |
| Sm70Tb30 | y0 | -0.34269   | 0.09244        | 0.16989         | 0.99885       |
|          | A1 | 8.70E+09   | 1.26E+11       |                 |               |
|          | t1 | 0.41801    | 0.28294        |                 |               |
|          | A2 | 158.59406  | 4.21378        |                 |               |
|          | t2 | 7.58036    | 0.1128         |                 |               |
| Sm60Tb40 | y0 | -0.23662   | 0.09777        | 0.16356         | 0.99936       |
|          | A1 | 1814.41753 | 3423.844       |                 |               |
|          | t1 | 0.54296    | 0.56264        |                 |               |
|          | A2 | 214.98878  | 10.58073       |                 |               |
|          | t2 | 7.31989    | 0.15076        |                 |               |
| Sm50Tb50 | y0 | -0.57201   | 0.17955        | 0.631           | 0.99873       |
|          | A1 | 1.01E+08   | 6.42E+08       |                 |               |
|          | t1 | 0.55664    | 0.2223         |                 |               |
|          | A2 | 289.15008  | 8.86876        |                 |               |
|          | t2 | 7.56383    | 0.12621        |                 |               |
| Sm40Tb60 | y0 | -0.11624   | 0.01952        | 0.00682         | 0.99972       |
|          | A1 | 3662.87351 | 2821.111       |                 |               |
|          | t1 | 0.67100    | 0.149          |                 |               |
|          | A2 | 64.36181   | 1.69518        |                 |               |
|          | t2 | 7.36749    | 0.08721        |                 |               |
| Sm30Tb70 | y0 | -0.36427   | 0.12423        | 0.33198         | 0.9992        |
|          | A1 | 7.77E+12   | 2.13E+14       |                 |               |
|          | t1 | 0.32236    | 0.31683        |                 |               |
|          | A2 | 290.33067  | 6.45823        |                 |               |
|          | t2 | 7.17237    | 0.0861         |                 |               |
| Sm20Tb80 | y0 | -0.47851   | 0.17938        | 0.65873         | 0.99885       |
|          | A1 | 3.75E+06   | 2.28E+07       |                 |               |
|          | t1 | 0.68625    | 0.3237         |                 |               |
|          | A2 | 335.98149  | 11.29084       |                 |               |
|          | t2 | 7.19245    | 0.12184        |                 |               |
| Sm90Tb10 | y0 | 0.03792    | 0.02464        | 0.00815         | 0.99996       |
|          | A1 | 481.91706  | 129.1183       |                 |               |
|          | t1 | 2.08193    | 0.16224        |                 |               |
|          | A2 | 168.46724  | 2.86231        |                 |               |

|          |    |            |          |         |         |
|----------|----|------------|----------|---------|---------|
|          | t2 | 7.92291    | 0.054    |         |         |
| Sm08Tb92 | y0 | -0.10212   | 0.0386   | 0.03573 | 0.9997  |
|          | A1 | 7.93E+11   | 1.26E+13 |         |         |
|          | t1 | 2.04088    | 0.20611  |         |         |
|          | A2 | 141.76163  | 1.69561  |         |         |
|          | t2 | 8.09928    | 0.05348  |         |         |
| Sm06Tb94 | y0 | 0.07544    | 0.09276  | 0.44074 | 0.99914 |
|          | A1 | 4246.93205 | 5.27E+08 |         |         |
|          | t1 | 2.51358    | --       |         |         |
|          | A2 | 349.70135  | 3.65767  |         |         |
|          | t2 | 8.28745    | 0.05122  |         |         |
| Sm04Tb96 | y0 | 0.11311    | 0.03236  | 0.03083 | 0.99994 |
|          | A1 | 177.37358  | 23.74793 |         |         |
|          | t1 | 3.37104    | 0.30187  |         |         |
|          | A2 | 224.64578  | 5.52201  |         |         |
|          | t2 | 9.89412    | 0.08839  |         |         |
| Sm02Tb98 | y0 | 0.17476    | 0.0311   | 0.0198  | 0.99995 |
|          | A1 | 95.15387   | 2.16904  |         |         |
|          | t1 | 9.64323    | 0.23446  |         |         |
|          | A2 | 82.14667   | 2.86458  |         |         |
|          | t2 | 23.46238   | 0.32499  |         |         |

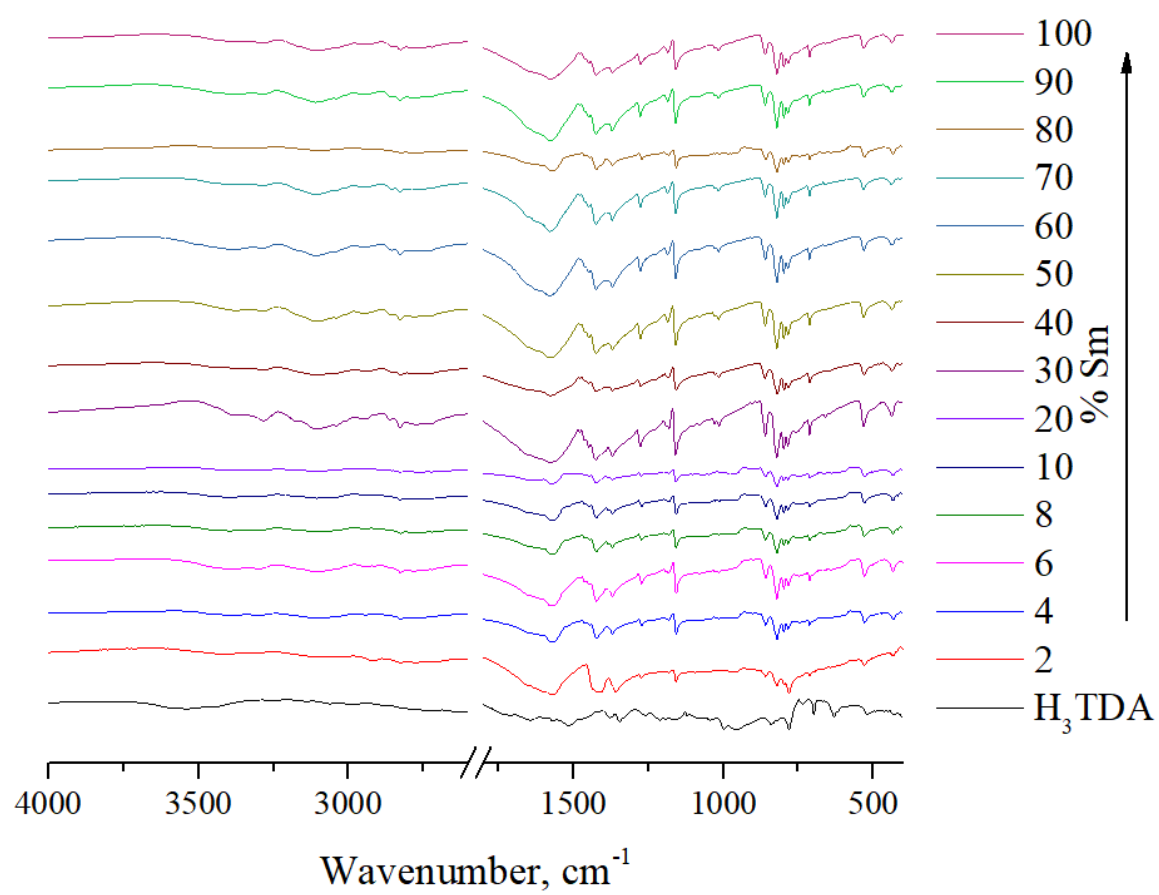

Figure S1. IR spectra of complexes  $\text{Sm}_x\text{Gd}_{1-x}\text{TDA}$  and free  $\text{H}_3\text{TDA}$  ligand

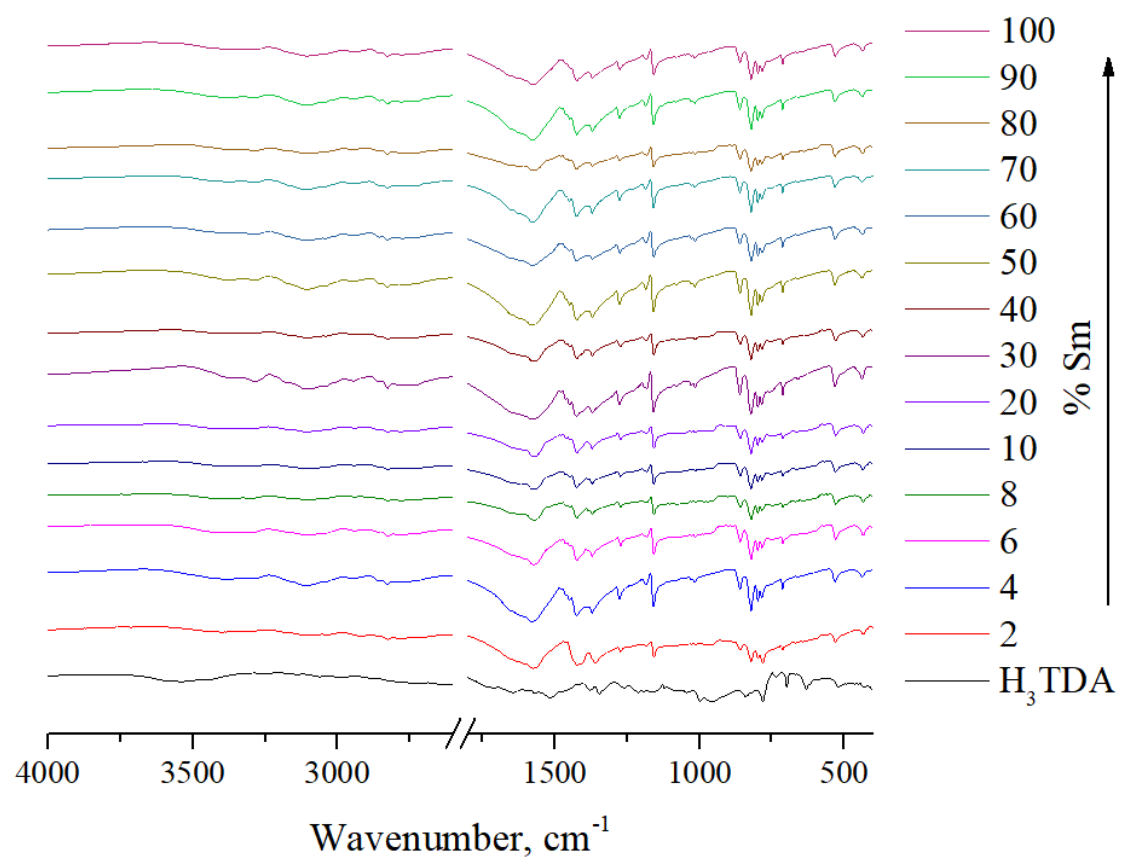

Figure S2. IR spectra of complexes  $\text{Sm}_x\text{Tb}_{1-x}\text{-TDA}$  and free  $\text{H}_3\text{TDA}$  ligand



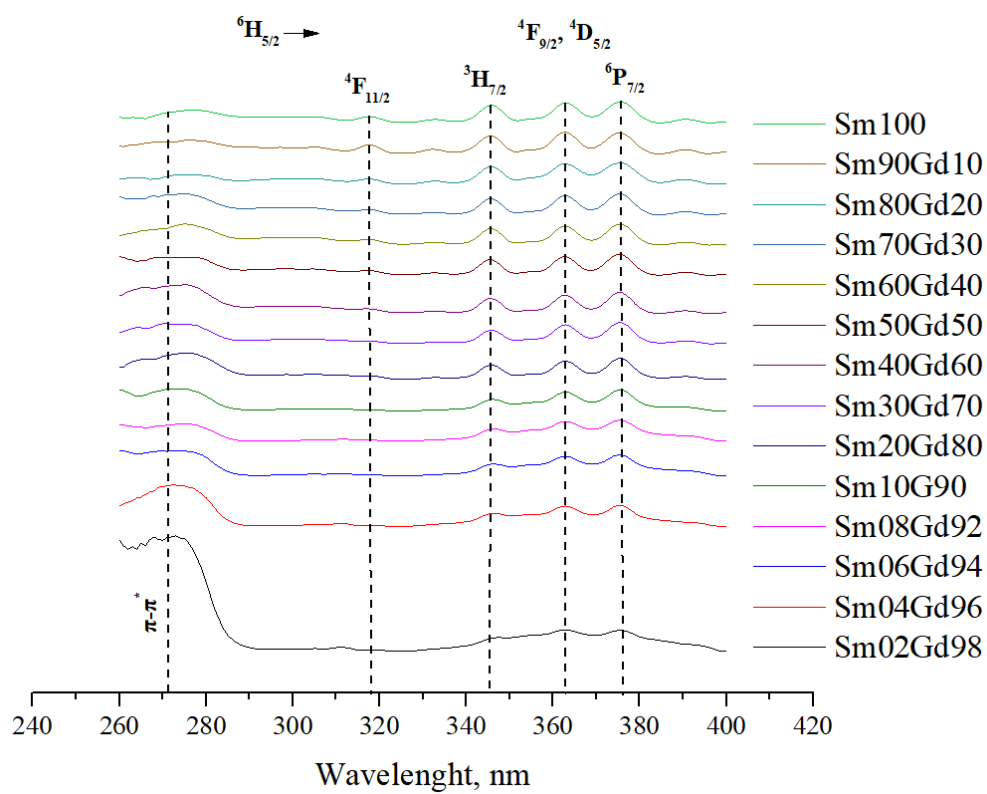

Figure S3. Excitation spectra of Sm<sub>x</sub>Gd<sub>1-x</sub>-TDA complexes ( $\lambda_{\text{em}}$  648 nm).

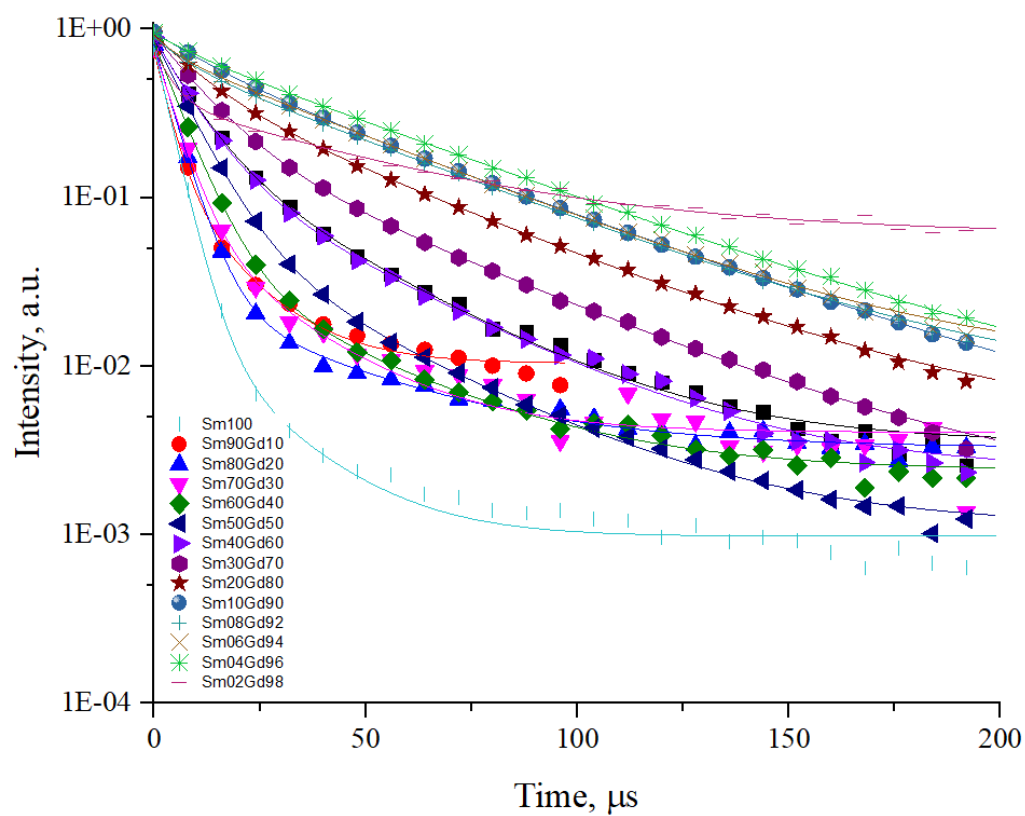

S

Figure S4.  $\text{Sm}^{3+}$  decay curves for  $\text{Sm}_x\text{Gd}_{1-x}\text{-TDA}$ ;  $\lambda_{\text{EX}}=280\text{ nm}$ ,  $\lambda_{\text{EM}}=648\text{ nm}$ .

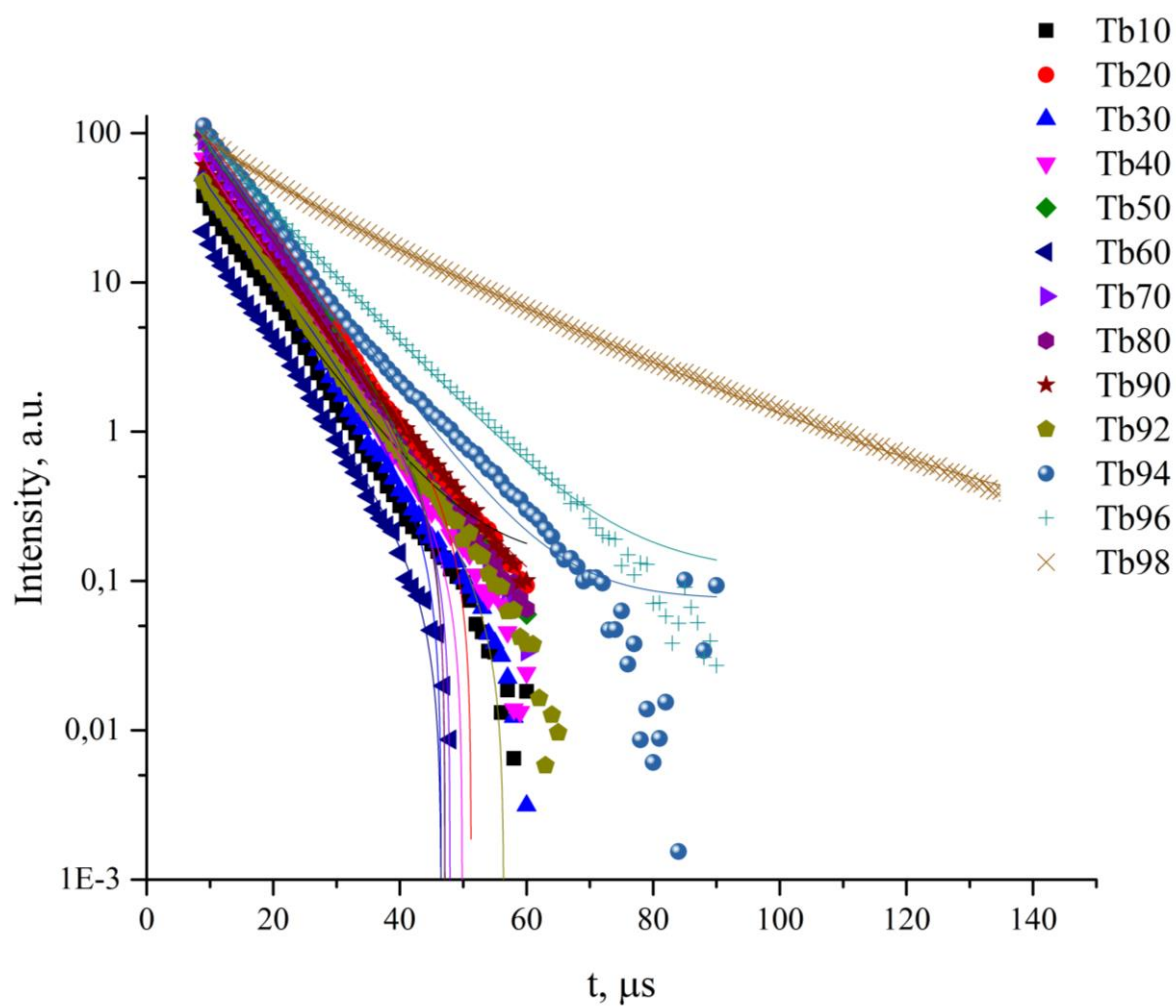

Figure S5.  $\text{Tb}^{3+}$  decay curves for  $\text{Sm}_x\text{Tb}_{1-x}\text{-TDA}$ ;  $\lambda_{\text{EX}}=280\text{ nm}$ ,  $\lambda_{\text{EM}}=545\text{ nm}$ .

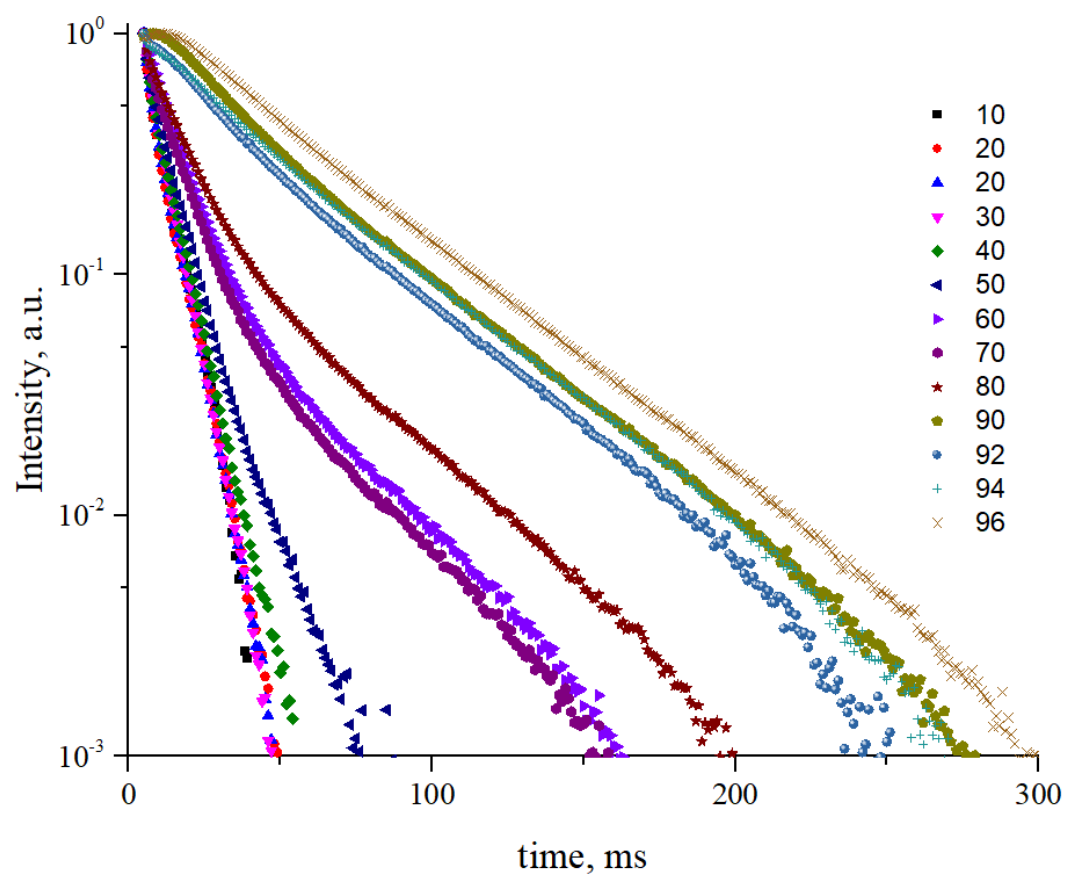

Figure S6.  $\text{Sm}^{3+}$  decay curves for  $\text{Sm}_x\text{Tb}_{1-x}\text{-TDA}$ ;  $\lambda_{\text{EX}}=280$  nm,  $\lambda_{\text{EM}}=648$  nm.
